# Supplementary material for: Long Leukocyte Telomere Length at Diagnosis Is a Risk Factor for Dementia Progression in Idiopathic Parkinsonism
Source: PubMed Central journal article supplement (PMC4264694; doi:10.1371/journal.pone.0113387), 2014-12-12
Supplement: pone.0113387.s001.pdf [file pone.0113387.s001.pdf]

Supplementary Table S1

| Patient | Diagnosis | Age at baseline | RTL baseline | RTL 12 month FU | RTL 24 month FU | RTL 36 month FU | RTL 48 month FU | RTL 60 month FU | Hoehn and Yahr stage baseline | Hoehn and Yahr stage 12 month FU | Hoehn and Yahr stage 36 month FU | Hoehn and Yahr stage 60 month FU | HY stage $\geq 3$ within 3 yr from baseline | Cognitive status baseline | Cogn_stat_12 month FU | Cogn_stat_24 month FU | Cogn_stat_36 month FU | Cogn_stat_48 month FU | Cogn_stat_60 month FU | Dementia progression within $\leq 3$ years |
|---------|-----------|-----------------|--------------|-----------------|-----------------|-----------------|-----------------|-----------------|-------------------------------|----------------------------------|----------------------------------|----------------------------------|---------------------------------------------|---------------------------|-----------------------|-----------------------|-----------------------|-----------------------|-----------------------|--------------------------------------------|
| 8       | PD        | 64              | 1.06         | 0.99            | 0.82            |                 |                 | 0.74            | 3                             | 2.5                              | 3                                | 2.5                              | Yes                                         | Normal                    | Normal                | Normal                | Normal                | Normal                | MCI                   | No                                         |
| 9       | PD        | 56              | 0.89         | 0.84            |                 | 0.84            | 0.76            | 0.71            | 2                             | 2                                | 2                                | 2                                | No                                          | Normal                    | Normal                | Normal                | Normal                | Normal                | Normal                | No                                         |
| 10      | PD        | 81              |              | 0.74            | 0.77            | 0.68            | 0.72            | 0.82            | 1                             | 2.5                              | 3                                | 3                                | Yes                                         | Normal                    | Normal                | Normal                | Normal                | Normal                | Normal                | No                                         |
| 18      | PD        | 61              | 1.09         | 1.16            | 1.10            | 1.04            | 0.87            | 0.94            | 1                             | 1                                | 1.5                              | 2                                | No                                          | Normal                    | Normal                | Normal                | Normal                | Normal                | Normal                | No                                         |
| 19      | PD        | 77              | 0.76         | 0.63            | 0.57            | 0.49            | 0.42            | 0.47            | 1                             | 1                                | 2                                | 2                                | No                                          | Normal                    | Normal                | Normal                | Normal                | Normal                | Normal                | No                                         |
| 20      | PD        | 70              | 0.68         | 0.65            | 0.68            | 0.57            | 0.59            | 0.57            | 2                             | 2.5                              | 2                                | 2                                | No                                          | Normal                    | Normal                | Normal                | MCI                   | Normal                | Normal                | No                                         |
| 23      | PD        | 71              | 0.54         | 0.47            | 0.46            | 0.47            |                 | 0.44            | 1                             | 1                                | 2                                | 2                                | No                                          | Normal                    | MCI                   | MCI                   | MCI                   | MCI                   | MCI                   | No                                         |
| 24      | PD        | 84              | 0.94         | 1.15            |                 |                 |                 |                 | 4                             | 4                                | 5                                |                                  | Yes                                         | MCI                       | MCI                   | Dementia              | Dementia              |                       |                       | Yes                                        |
| 33      | PD        | 55              | 0.94         | 0.82            | 0.95            | 0.77            | 0.90            | 0.79            | 2                             | 2                                | 2                                | 2                                | No                                          | Normal                    | Normal                | Normal                | Normal                | Normal                | Normal                | No                                         |
| 34      | PD        | 63              | 0.85         | 0.71            | 0.80            | 0.81            | 0.83            | 0.63            | 2                             | 2                                | 2                                | 2                                | No                                          | Normal                    | Normal                | Normal                | Normal                | Normal                | Normal                | No                                         |
| 37      | PD        | 65              | 0.73         | 0.78            |                 | 0.74            |                 | 0.86            | 2                             | 2                                | 2                                | 2                                | No                                          | Normal                    | Normal                | Normal                | Normal                | Normal                | Normal                | No                                         |
| 39      | PD        | 77              |              | 0.62            | 0.75            | 0.66            | 0.52            | 0.50            | 2                             | 3                                | 2                                | 4                                | Yes                                         | Normal                    | Normal                | Normal                | Normal                | Normal                | Normal                | No                                         |
| 42      | PD        | 55              |              | 0.87            | 0.89            |                 | 0.86            | 0.73            | 2                             | 2                                | 2                                | 4                                | No                                          | MCI                       | MCI                   | MCI                   | MCI                   | MCI                   | Dementia              | No                                         |
| 43      | PD        | 83              | 0.82         |                 | 0.78            | 0.66            |                 |                 | 3                             | 3                                | 5                                |                                  | Yes                                         | MCI                       | MCI                   | MCI                   | Dementia              |                       |                       | Yes                                        |
| 46      | PD        | 55              |              | 0.76            | 0.75            | 0.66            | 0.83            | 0.77            | 2                             | 2                                | 3                                | 3                                | Yes                                         | Normal                    | Normal                | Normal                | Normal                | Normal                | Normal                | No                                         |
| 53      | PD        | 65              | 0.75         | 0.68            | 0.62            |                 |                 |                 | 2                             | 2                                | 2                                | 2                                | No                                          | Normal                    | Normal                | Normal                | Normal                | Normal                | Normal                | No                                         |
| 57      | PD        | 62              | 0.82         | 0.74            | 0.84            | 0.78            | 0.73            | 0.77            | 2.5                           | 2                                | 2                                | 2                                | No                                          | MCI                       | MCI                   | MCI                   | MCI                   | MCI                   | MCI                   | No                                         |
| 59      | PD        | 63              |              | 0.55            | 0.61            | 0.55            | 0.55            | 0.61            |                               | 1                                | 2                                | 2                                | No                                          | Normal                    | MCI                   | MCI                   | MCI                   | Normal                | Normal                | No                                         |
| 62      | PD        | 69              | 0.84         | 0.72            | 0.81            | 0.79            | 0.72            | 0.69            | 3                             | 1                                | 2.5                              | 2.5                              | Yes                                         | Normal                    | Normal                | Normal                | Normal                | Normal                | Normal                | No                                         |
| 64      | PD        | 77              | 0.64         | 0.52            | 0.67            | 0.50            | 0.57            | 0.56            | 3                             | 3                                | 3                                | 4                                | Yes                                         | MCI                       | Normal                | Normal                | Normal                | Normal                | Normal                | No                                         |
| 65      | PD        | 82              | 0.74         | 0.67            | 0.72            | 0.66            |                 | 0.71            | 2                             | 2                                | 2                                | 2                                | No                                          | Normal                    | Normal                | Normal                | Normal                | Normal                | Normal                | No                                         |
| 67      | PD        | 56              | 0.87         | 0.97            | 0.90            |                 |                 | 0.79            | 2                             | 2                                |                                  | 2                                | No                                          | MCI                       | Normal                | Normal                | Normal                | Normal                | MCI                   | No                                         |
| 68      | PD        | 70              |              |                 | 0.76            | 0.77            | 0.71            | 0.79            |                               |                                  | 2.5                              | 4                                | No                                          | MCI                       | MCI                   | MCI                   | MCI                   | MCI                   | MCI                   | No                                         |
| 72      | PD        | 62              | 0.65         | 0.69            | 0.60            | 0.76            | 0.71            | 0.72            | 3                             | 3                                | 2                                | 2                                | Yes                                         | MCI                       | MCI                   | MCI                   | MCI                   | MCI                   | MCI                   | No                                         |
| 73      | PD        | 64              | 0.86         | 0.87            | 0.83            | 0.94            | 0.81            | 0.85            | 2                             | 3                                | 2                                | 2.5                              | Yes                                         | MCI                       | MCI                   | MCI                   | MCI                   | MCI                   | MCI                   | No                                         |
| 74      | PD        | 65              | 0.65         | 0.72            | 0.67            | 0.58            | 0.66            | 0.62            | 2                             | 2                                | 2                                | 2                                | No                                          | MCI                       | MCI                   | MCI                   | MCI                   | MCI                   | MCI                   | No                                         |
| 78      | PD        | 58              | 0.55         | 0.61            | 0.66            | 0.51            | 0.52            | 0.52            | 2                             | 2                                | 2                                | 2                                | No                                          | Normal                    | Normal                | Normal                | Normal                | Normal                | Normal                | No                                         |
| 79      | PD        | 72              | 0.85         | 0.78            | 0.68            | 0.72            | 0.66            | 0.86            | 1.5                           | 2                                | 2                                | 3                                | No                                          | MCI                       | MCI                   | MCI                   | Dementia              | Dementia              | Dementia              | Yes                                        |
| 81      | PD        | 57              | 0.78         | 0.74            | 0.94            | 0.81            | 0.84            | 0.67            | 1                             | 1                                | 1                                | 2                                | No                                          | Normal                    | Normal                | Normal                | Normal                | Normal                | Normal                | No                                         |
| 86      | PD        | 40              | 1.07         |                 | 1.08            | 0.82            | 0.87            | 0.96            | 1                             |                                  | 2                                | 2                                | No                                          | Normal                    | Normal                | Normal                | Normal                | Normal                | Normal                | No                                         |
| 87      | PD        | 78              | 0.73         | 0.65            | 0.58            | 0.59            | 0.51            | 0.56            | 2.5                           | 2                                | 2.5                              | 4                                | No                                          | Normal                    | Normal                | Normal                | Normal                | Normal                | Normal                | No                                         |
| 89      | PD        | 76              | 0.67         | 0.78            | 0.63            | 0.59            |                 |                 | 2                             | 2                                | 3                                |                                  | Yes                                         | MCI                       | MCI                   | Dementia              | Dementia              |                       |                       | Yes                                        |
| 96      | PD        | 59              | 0.95         |                 | 0.80            | 0.78            | 0.71            | 0.77            | 2.5                           |                                  | 2                                | 2                                | No                                          | Normal                    | Normal                | Normal                | Normal                | Normal                | MCI                   | No                                         |
| 97      | PD        | 58              | 0.78         | 1.03            | 0.98            | 0.97            | 0.86            | 0.92            | 1                             | 1.5                              | 2                                | 2                                | No                                          | Normal                    | Normal                | Normal                | Normal                | Normal                | Normal                | No                                         |
| 101     | PD        | 73              | 0.70         | 0.94            | 0.81            | 0.95            | 0.80            | 0.77            | 2                             | 2.5                              | 3                                | 3                                | Yes                                         | MCI                       | MCI                   | MCI                   | MCI                   | Dementia              | Dementia              | No                                         |
| 106     | PD        | 76              | 0.85         | 0.95            | 0.88            |                 | 0.92            | 0.91            | 2                             | 2                                | 4                                | 4                                | Yes                                         | Normal                    | Normal                | Normal                | MCI                   | Dementia              | Dementia              | No                                         |
| 114     | PD        | 77              | 0.96         | 0.76            | 0.70            | 0.83            | 0.91            |                 | 3                             | 5                                | 4                                |                                  | Yes                                         | MCI                       | Dementia              | Dementia              | Dementia              | Dementia              | Dementia              | Yes                                        |
| 118     | PD        | 70              | 0.74         | 0.75            | 0.76            | 0.67            | 0.65            | 0.70            | 2                             | 2                                | 2                                | 2                                | No                                          | MCI                       | Normal                | Normal                | Normal                | Normal                | Normal                | No                                         |
| 119     | PD        | 83              |              |                 | 0.68            | 0.67            | 0.66            |                 | 5                             | 5                                | 4                                | 4                                | Yes                                         | MCI                       | MCI                   | Dementia              | Dementia              | Dementia              | Dementia              | Yes                                        |
| 133     | PD        | 62              | 0.49         | 0.69            |                 |                 | 0.48            | 0.63            | 2                             | 2.5                              | 3                                | 2                                | Yes                                         | Normal                    | Normal                | Normal                | Normal                | Normal                | Normal                | No                                         |
| 141     | PD        | 65              | 1.02         | 0.94            |                 | 0.95            | 0.86            | 0.91            | 1.5                           | 1.5                              | 2.5                              | 2.5                              | No                                          | Normal                    | MCI                   | MCI                   | MCI                   | Dementia              | Dementia              | No                                         |
| 146     | PD        | 67              | 0.77         | 0.73            | 0.61            | 0.66            | 0.76            | 0.77            | 2                             | 2                                | 2                                | 2                                | No                                          | MCI                       | MCI                   | MCI                   | MCI                   | Dementia              | Dementia              | No                                         |
| 150     | PD        | 67              | 0.33         | 0.47            | 0.44            | 0.62            | 0.59            | 0.45            | 2.5                           | 2                                | 2                                | 2                                | No                                          | MCI                       | MCI                   | MCI                   | MCI                   | MCI                   | MCI                   | No                                         |
| 151     | PD        | 60              | 0.67         | 0.67            | 0.60            | 0.66            | 0.63            | 0.70            | 2                             | 2                                | 2                                | 2                                | No                                          | Normal                    | Normal                | Normal                | Normal                | Normal                | Normal                | No                                         |
| 157     | PD        | 79              | 0.73         | 0.68            | 0.50            | 0.59            | 0.54            | 0.69            | 2.5                           | 2.5                              | 2                                | 2                                | No                                          | Normal                    | Normal                | Normal                | Normal                | Normal                | Normal                | No                                         |
| 171     | PD        | 79              | 0.78         | 0.73            | 0.74            | 0.65            |                 |                 | 4                             | 5                                | 4                                | 4                                | Yes                                         | Normal                    | Normal                | Normal                | MCI                   | Dementia              | Dementia              | No                                         |
| 173     | PD        | 47              | 0.83         | 0.86            | 0.70            | 0.61            | 0.83            | 0.74            | 2                             | 2                                | 2                                | 2                                | No                                          | Normal                    | Normal                | Normal                | MCI                   | Normal                | Normal                | No                                         |
| 174     | PD        | 77              |              | 0.60            | 0.63            | 0.61            |                 |                 | 2.5                           | 2.5                              | 3                                |                                  | Yes                                         | MCI                       | MCI                   | Dementia              | Dementia              | Dementia              | Dementia              | Yes                                        |
| 175     | PD        | 80              | 0.95         | 0.80            | 0.86            | 0.85            |                 | 0.79            | 3                             | 2                                | 2                                | 2.5                              | Yes                                         | MCI                       | MCI                   | MCI                   | MCI                   | Dementia              | Dementia              | No                                         |
| 177     | PD        | 61              | 0.51         | 0.58            | 0.59            | 0.49            | 0.55            | 0.64            | 2.5                           | 2                                | 2                                | 2                                | No                                          | Normal                    | Normal                | Normal                | Normal                | Normal                | Normal                | No                                         |
| 180     | PD        | 63              | 0.78         | 0.73            | 0.73            | 0.66            | 0.71            | 0.58            | 2                             | 2                                | 2.5                              | 2                                | No                                          | Normal                    | Normal                | Normal                | Normal                | Normal                | MCI                   | No                                         |
| 187     | PD        | 70              | 0.88         | 0.95            | 0.71            | 0.80            | 0.73            | 0.80            | 2                             | 2.5                              | 2                                | 2                                | No                                          | Normal                    | Normal                | Normal                | Normal                | Normal                | Normal                | No                                         |
| 188     | PD        | 84              | 0.59         | 0.73            | 0.52            | 0.60            | 0.66            | 0.46            | 3                             | 3                                | 3                                | 2.5                              | Yes                                         | Normal                    | Normal                | Normal                | Normal                | Normal                | MCI                   | No                                         |
| 195     | PD        | 71              | 0.87         | 0.81            | 0.61            | 0.66            | 0.87            |                 | 2.5                           | 1                                | 2                                | 2                                | No                                          | Normal                    | Normal                | Normal                | Normal                | Normal                | Normal                | No                                         |
| 196     | PD        | 59              | 0.80         | 0.70            |                 | 0.66            | 0.64            |                 | 2                             | 1.5                              | 2                                | 2                                | No                                          | Normal                    | Normal                | Normal                | Normal                | Normal                | Normal                | No                                         |
| 198     | PD        | 71              | 0.58         | 0.53            | 0.54            | 0.43            | 0.57            | 0.48            | 2.5                           | 1                                | 2                                | 2                                | No                                          | MCI                       | Normal                | Normal                | Normal                | Normal                | MCI                   | No                                         |
| 199     | PD        | 76              | 0.85         |                 | 0.88            | 0.94            | 0.86            | 0.80            | 2.5                           | 2.5                              | 2                                | 2.5                              | No                                          | MCI                       | MCI                   | Dementia              | Dementia              | Dementia              | Dementia              | Yes                                        |
| 206     | PD        | 74              | 0.74         | 0.72            | 0.66            | 0.81            |                 |                 | 2.5                           | 2                                | 2                                | 2                                | No                                          | MCI                       | MCI                   | MCI                   | MCI                   | MCI                   | MCI                   | No                                         |
| 208     | PD        | 79              | 0.65         | 0.55            | 0.64            |                 |                 |                 | 3                             | 3                                | 2.5                              |                                  | Yes                                         | MCI                       | MCI                   |                       |                       |                       |                       | No                                         |
| 211     | PD        | 76              |              | 0.62            | 0.74            | 0.51            | 0.61            |                 | 2                             | 3                                | 3                                | 3                                | Yes                                         | MCI                       | MCI                   | MCI                   | MCI                   | MCI                   | MCI                   | No                                         |
| 213     | PD        | 88              | 0.92         |                 | 0.59            |                 |                 |                 | 5                             | 4                                |                                  |                                  | Yes                                         | Normal                    | Normal                |                       |                       |                       |                       | No                                         |
| 216     | PD        | 65              | 0.92         | 0.81            | 0.85            | 0.78            | 0.90            |                 | 1.5                           | 3                                | 2                                |                                  | Yes                                         | Normal                    | Normal                | Normal                | Normal                | Normal                | Normal                | No                                         |
| 218     | PD        | 69              | 1.15         | 0.89            |                 | 0.90            | 0.97            |                 | 3                             | 2                                | 4                                | 4                                | Yes                                         | Normal                    | MCI                   | MCI                   | Dementia              | Dementia              | Dementia              | Yes                                        |
